# Supplementary material for: BALB/c-congenic ANP32B-deficient mice reveal a modifying locus that determines viability
Source: PubMed Central journal article supplement — Exp Anim. 2015 Nov 10;65(1):53–62. doi: 10.1538/expanim.15-0062 (PMC4783651; doi:10.1538/expanim.15-0062), 2015-11-10
Supplement: expanim-65-053-s001.pdf [file expanim-65-053-s001.pdf]

|                             | Parameter    |              |              |              |                  |                   |                          |                 |                    |                  |                |                       |
|-----------------------------|--------------|--------------|--------------|--------------|------------------|-------------------|--------------------------|-----------------|--------------------|------------------|----------------|-----------------------|
|                             | ALP<br>(U/L) | ALT<br>(U/L) | AST<br>(U/L) | CPK<br>(U/L) | Albumin<br>(g/L) | BUN<br>( $\mu$ M) | Creatinine<br>( $\mu$ M) | Glucose<br>(mM) | Phosphorus<br>(mM) | Chloride<br>(mM) | Sodium<br>(mM) | Triglycerides<br>(mM) |
| +/+ average                 | 86.5         | 21.5         | 56.5         | 145.38       | 3.14             | 17.88             | 0.138                    | 252             | 7.0875             | 102.125          | 19.13          | 150.6                 |
| -/- average                 | 92.5         | 25.1         | 66.9         | 207.25       | 3.04             | 18.25             | 0.125                    | 245             | 7.0125             | 102.875          | 18.65          | 163.1                 |
| Average pairwise change (%) | -6.9%        | -16.9%       | -18.4%       | -42.6%       | 3.2%             | -2.1%             | 9.1%                     | 2.9%            | 1.1%               | -0.7%            | -0.25%         | 13.35%                |
| p-value                     | 0.560        | 0.107        | 0.442        | 0.512        | 0.200            | 0.825             | 0.351                    | 0.723           | 0.825              | 0.265            | 0.351          | 0.082                 |

**Supplemental Table S1. Changes in clinical chemistry in adult *Anp32b*<sup>-/-</sup> mice.** Indicated parameters demonstrated statistically significant changes between adult paired +/+ and -/- mice (n=8). Statistical p-value determined by paired Student t-test. *ALP*, Alkaline Phosphatase; *ALT*, Alanine Aminotransferase; *AST*, Aspartate Aminotransferase; *CPK*, Creatine Phosphokinase; *BUN*, Blood Urea Nitrogen.

A/ Balb/c-congenic *Anp32b*<sup>-/-</sup> acquisition against time

| Litters  | <i>Anp32b</i> genotype obtained |     |     | Proportion of <i>Anp32b</i> <sup>-/-</sup> |
|----------|---------------------------------|-----|-----|--------------------------------------------|
|          | +/+                             | +/- | -/- |                                            |
| 1 to 10  | 11                              | 32  | 10  | 18.8%                                      |
| 11 to 20 | 20                              | 27  | 8   | 14.5%                                      |
| 21 to 30 | 19                              | 32  | 11  | 17.7%                                      |
| 31 to 40 | 19                              | 27  | 7   | 13.2%                                      |
| 41 to 50 | 17                              | 36  | 8   | 13.1%                                      |
| 51 to 60 | 16                              | 27  | 6   | 12.2%                                      |

B/ Balb/c-congenic *Anp32b*<sup>-/-</sup> acquisition against dam age

| age of dam (weeks) | <i>Anp32b</i> genotype obtained |     |     | Proportion of <i>Anp32b</i> <sup>-/-</sup> |
|--------------------|---------------------------------|-----|-----|--------------------------------------------|
|                    | +/+                             | +/- | -/- |                                            |
| <15                | 33                              | 45  | 16  | 17.0%                                      |
| 15-21              | 19                              | 51  | 16  | 18.6%                                      |
| 22-28              | 40                              | 55  | 12  | 11.2%                                      |
| 29+                | 10                              | 30  | 6   | 13.0%                                      |

**Supplemental Table S2. Failed hypothesis tests for variable *Anp32b*<sup>-/-</sup> acquisition in the six-generation Balb/c congenic background.**

A/

|                                        | Mouse 1 | Mouse 2 | Mouse 3 | Mouse 4 |
|----------------------------------------|---------|---------|---------|---------|
| Retained non-linked somatic SNPs       | 20      | 4       | 12      | 6       |
| Total non-linked somatic SNPs analysed | 1270    | 1270    | 1270    | 1270    |
| p (retained B6)                        | 0.0157  | 0.0032  | 0.0094  | 0.0047  |
| p (congenic Balbc)                     | 0.9843  | 0.9968  | 0.9906  | 0.9953  |

B/

| SNP        | Chromosome | Retained on Mouse # | Calculated Probability                                                      |
|------------|------------|---------------------|-----------------------------------------------------------------------------|
| rs3707642  | 1          | 1                   | $0.0157 \times 0.9968 \times 0.9906 \times 0.9953 = 0.0154$                 |
| rs3710548  | 3          | 2, 4                | $0.9843 \times 0.0032 \times 0.9906 \times 0.0047 = 1.46 \times 10^{-5}$    |
| rs6190775  | 11         | 1,2,4               | $0.0157 \times 0.0032 \times 0.9906 \times 0.0047 = 2.32 \times 10^{-7} **$ |
| rs13482738 | 15         | 1,3                 | $0.0157 \times 0.9968 \times 0.0094 \times 0.9953 = 1.48 \times 10^{-4}$    |
| rs3686467  | 19         | 1,3                 | $0.0157 \times 0.9968 \times 0.0094 \times 0.9953 = 1.48 \times 10^{-4}$    |

**Supplemental Table S3. Calculation of probability of retention of non-linked somatic SNPs.** A. Calculation of C57BL/6J SNPs retention rates in mice of the six-generation Balb/c-congenic colony. B. Representative calculation of SNP retention probability from the five somatic chromosomes that were identified as carrying some C57BL/6J SNPs. X-chromosome had no C57BL/6 SNP retention but was excluded from analysis based on complex segregation. \*\*, Very high statistical significance is determined using Bonferroni adjustment of  $p < 0.001$ , i.e.  $0.001/1270 = 7.87 \times 10^{-7}$

| Chromosome 11 nucleotide location | Gene         | Substitution | SNP Identifier | Present in Sanger Database | Present in Leo et al. colony | Location in Gene | Predicted effect        |
|-----------------------------------|--------------|--------------|----------------|----------------------------|------------------------------|------------------|-------------------------|
| 5867697                           | <i>Aebp1</i> | C to T       | N/A            | No                         | Yes                          | Coding sequence  | Missense mutation S394F |
| 7063524                           | <i>Adcy1</i> | G to C       | rs212110788    | Yes                        | No                           | 5' UTR           | unknown                 |

**Supplemental Table S4. Deviations from reported Balb/c polymorphisms against reference C57BL/6 sequence in region surrounding rs6190775.** *N/A*, not available; *5'UTR*, 5' untranslated region
